# Supplementary material for: PCNA-associated factor KIAA0101 transcriptionally induced by ELK1 controls cell proliferation and apoptosis in nasopharyngeal carcinoma: an integrated bioinformatics and experimental study
Source: publisher site journal article supplement (doi:10.18632/aging.102991), 2020-04-09
Supplement: Supplementary file [file aging-v12i7-102991-supplementary-material-SD1.pdf]

**SUPPLEMENTARY FIGURES**

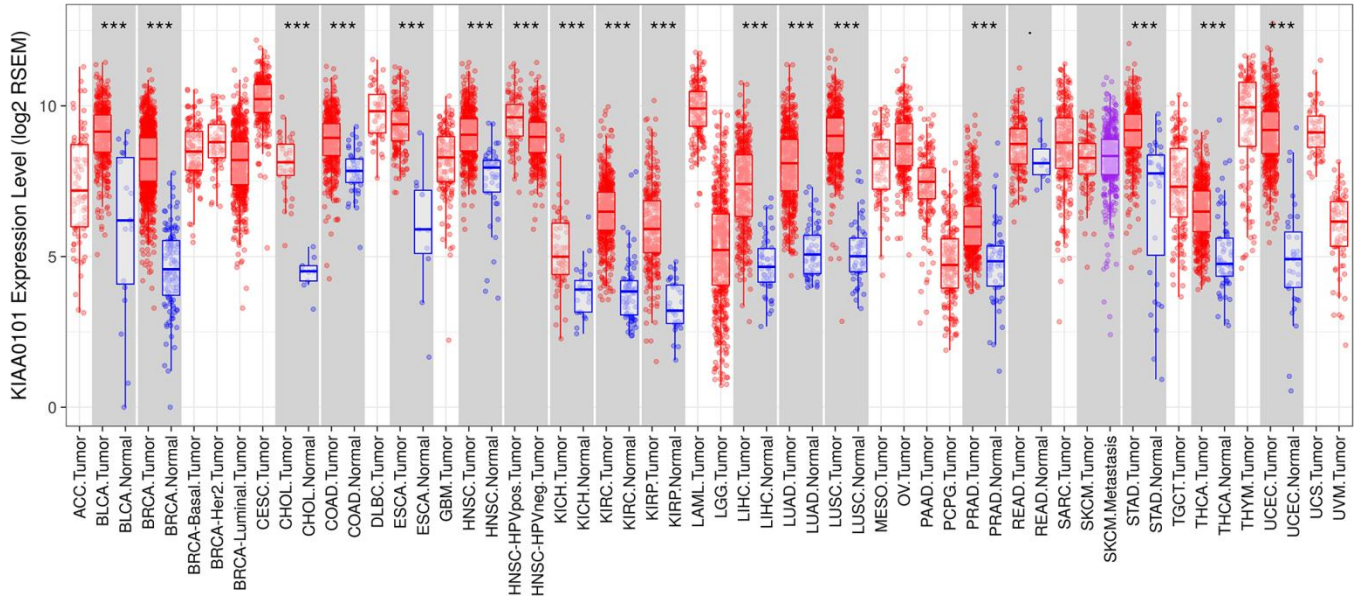

**Supplementary Figure 1. Highly expressed KIAA0101 in several human cancer types.**

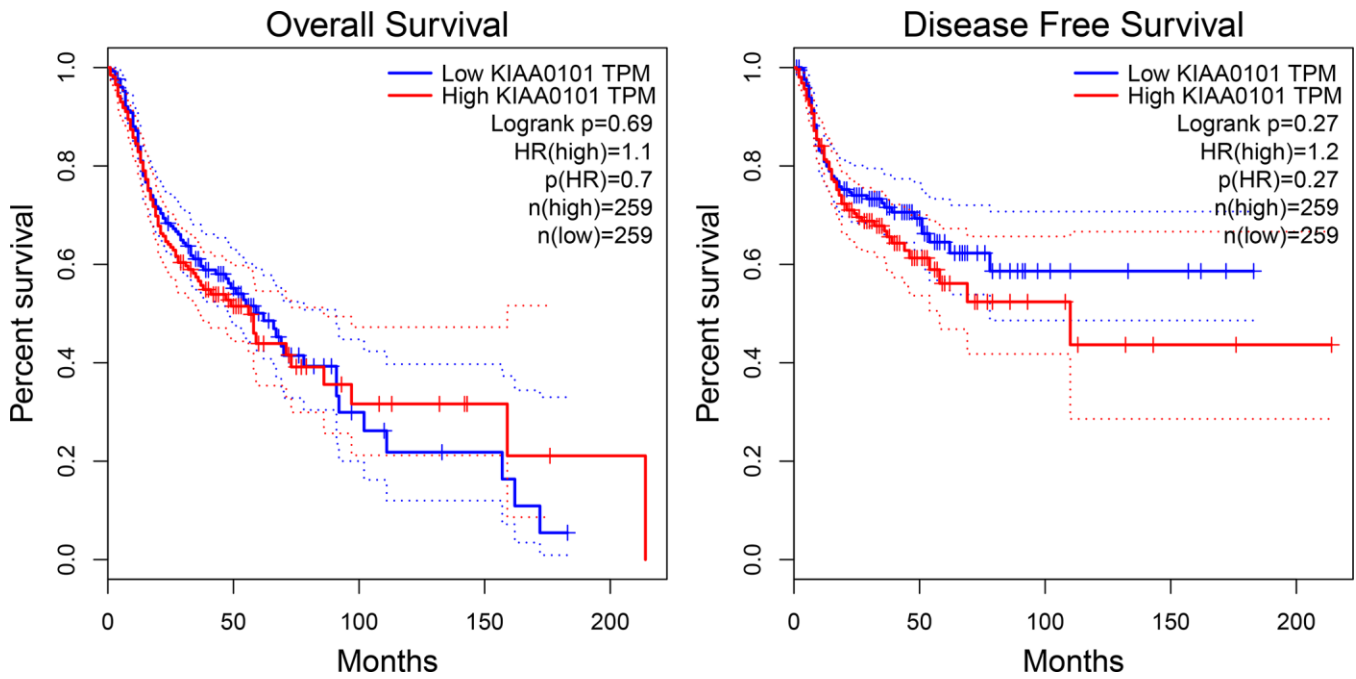

**Supplementary Figure 2. Overall and disease-free survival analysis of KIAA0101 in TCGA HNSC samples.**

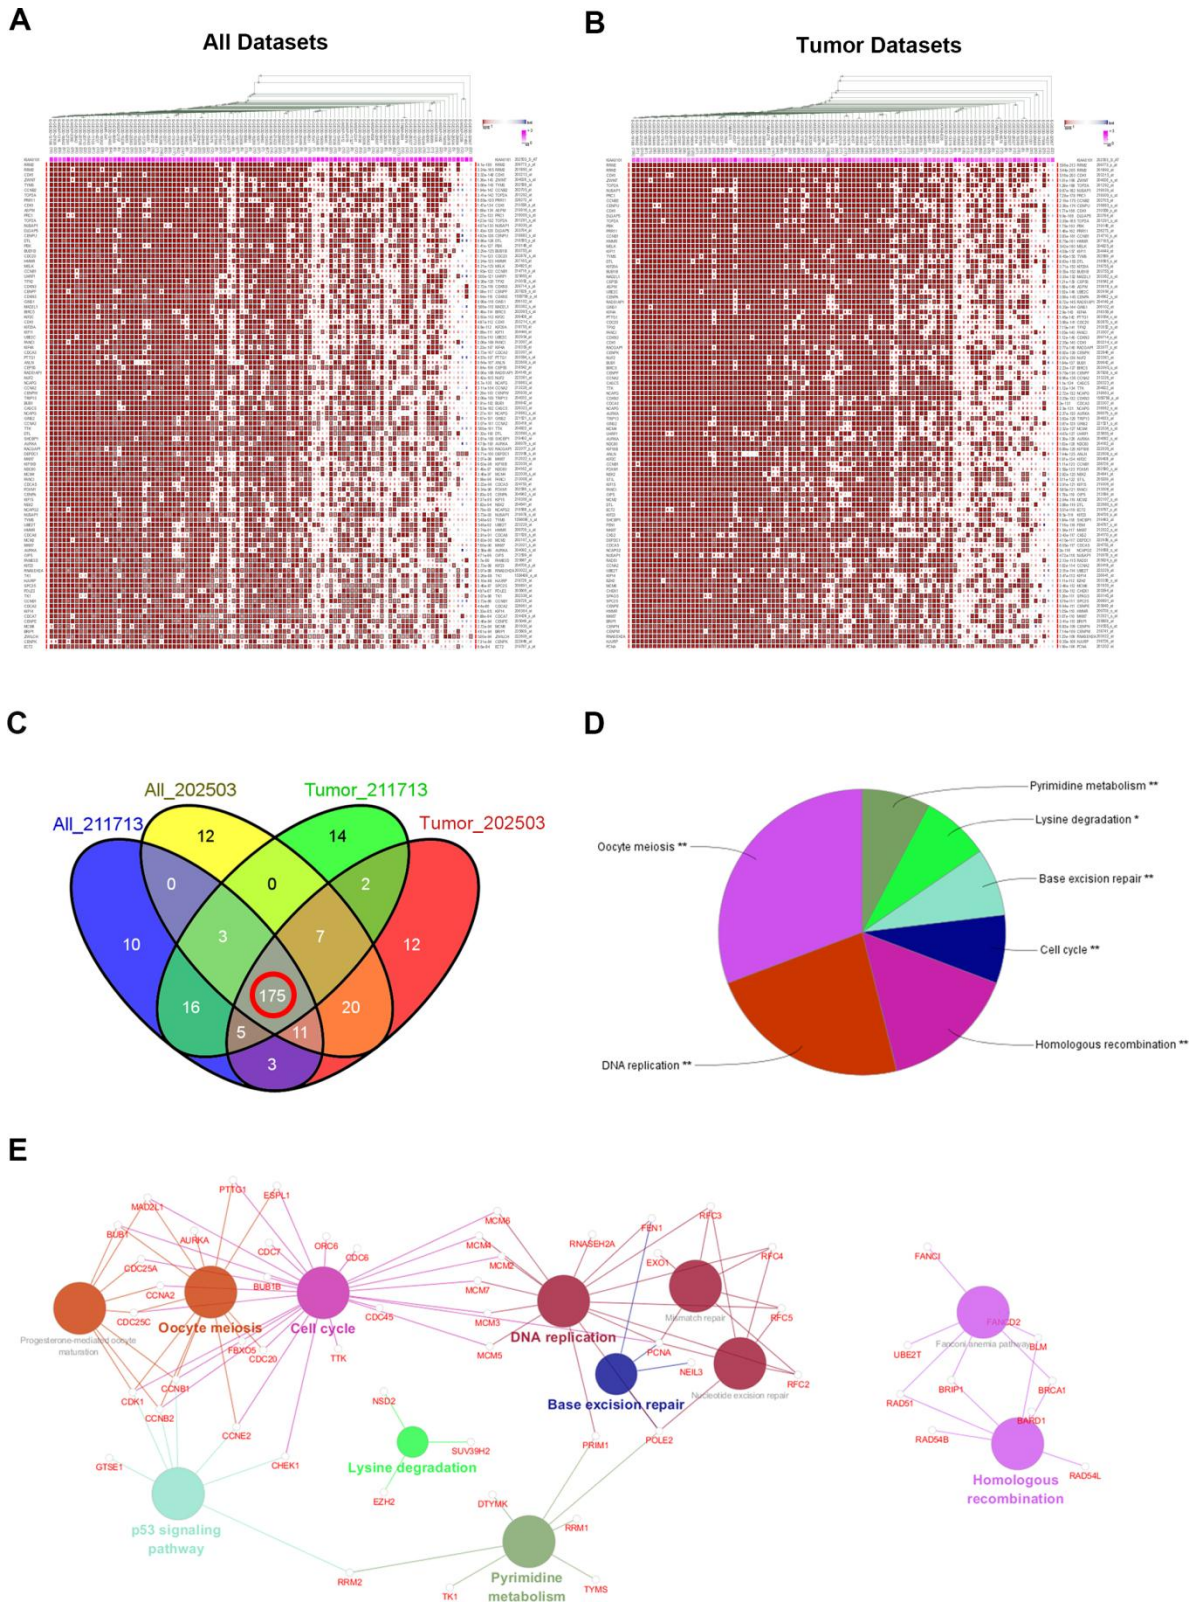

**Supplementary Figure 3. MEM co-expression analysis of KIAA0101 reveals DNA replication and cell cycle pathways participate in tumor process. (A, B)** Heatmap analysis of all and tumor datasets showing top 100 co-expressed genes with KIAA0101 probe 202503\_S\_AT. **(C)** Overlap venn diagram of co-expressed genes in all and tumor datasets queried with KIAA0101 probes 202503\_S\_AT and 211713\_S\_AT. **(D, E)** Pie chart and pathway enrichment analysis of 158 common genes with Cytoscape CluGO KEGG (17 same genes deleted).

**A**

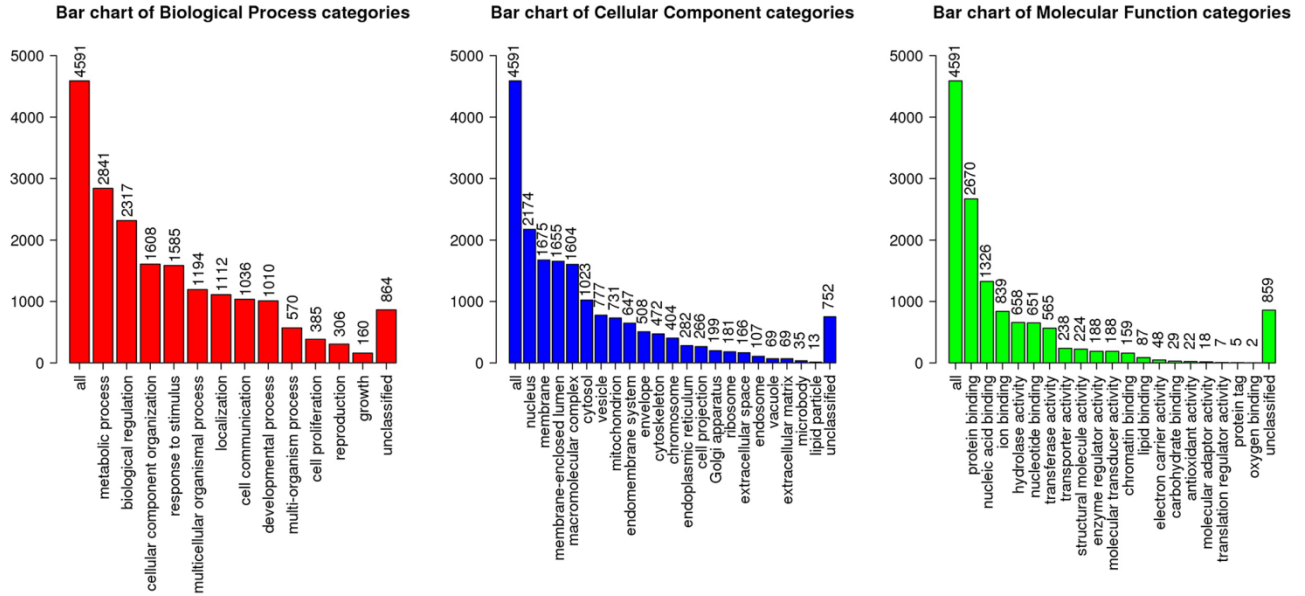

**B**

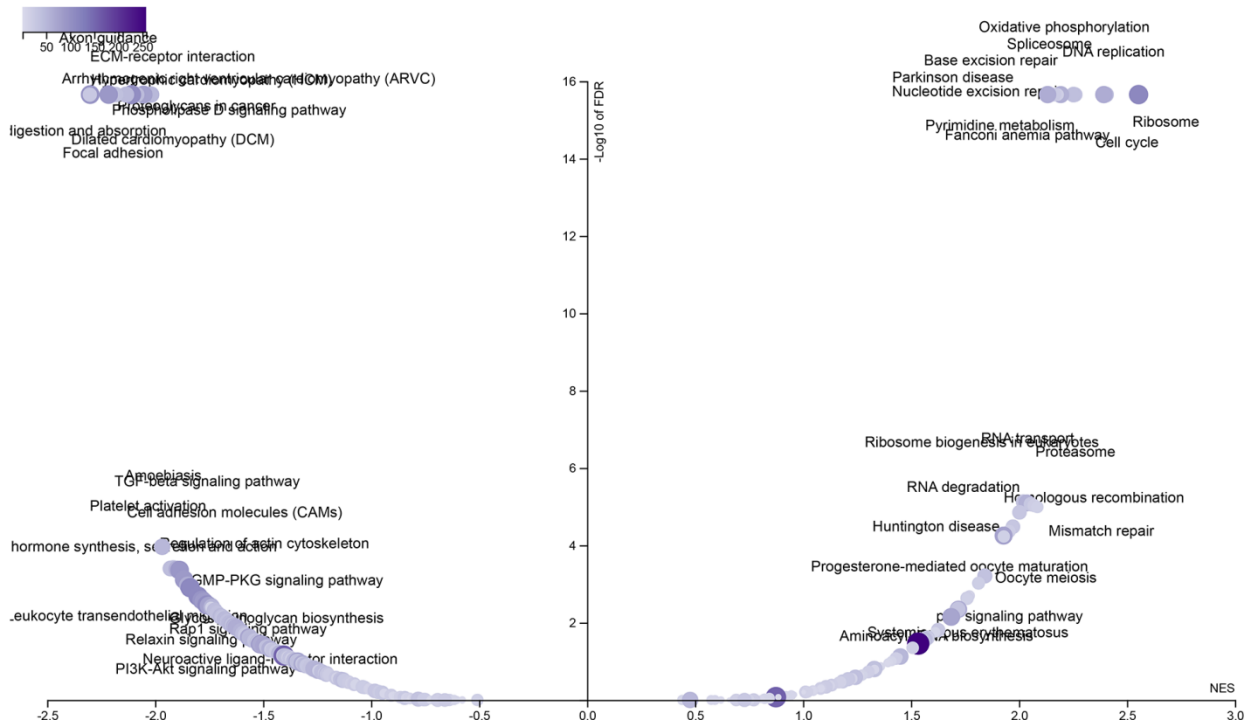

Supplementary Figure 4. LinkedOmics GSEA analysis results of co-expression genes with positive or negative correlations with KIAA0101 in TCGA HNSC samples.
